# Supplementary material for: Antimicrobially active cycloundecapeptides related to gramicidin S having a novel turn structure with cisd-Phe-Pro peptide bond
Source: Royal Society of Chemistry journal article supplement (doi:10.1039/b922159j), 2010-01-01
Supplement: b922159j.pdf [file b922159j.pdf]

## Antimicrobially Active Cycloundecapeptides Related to Gramicidin S Having A Novel Turn Structure with *cis* D-Phe-Pro Amido Bond

Makoto Tamaki<sup>a\*</sup>, Ichiro Sasaki<sup>a</sup>, Manabu Kokuno<sup>a</sup>,  
Mitsuno Shindo<sup>b</sup>, and Yoshiki Uchida<sup>b</sup>

<sup>1</sup>Department of Chemistry, Toho University, Funabashi, Chiba 274-8510, Japan

<sup>2</sup>Department of Food Science and Nutrition, Osaka Shoin Women's University, Higashi-Osaka,  
Osaka 577-8550, Japan

\*Email: tamaki@chem.sci.toho-u.ac.jp

### Table of Contents for the Supplementary data (total 16 pages)

- Page 1-2: Title, authors and their affiliations and Table of Contents.
- Page 3: HPLC analyses of **1-5**.
- Page 4: Figure 2. <sup>1</sup>H NMR spectrum of **1** in DMSO-*d*<sub>6</sub> at 30 °C.  
Table 1. All <sup>1</sup>H chemical shifts (δ in ppm) of **1**.
- Page 5: Figure 3. <sup>1</sup>H NMR spectrum of **2** in DMSO-*d*<sub>6</sub> at 30 °C.  
Table 2. All <sup>1</sup>H chemical shifts (δ in ppm) of **2**.
- Page 6: Figure 4. <sup>1</sup>H NMR spectrum of **3** in DMSO-*d*<sub>6</sub> at 30 °C.  
Table 3. All <sup>1</sup>H chemical shifts (δ in ppm) of **3**.
- Page 7: Figure 5. <sup>1</sup>H NMR spectrum of **4** in DMSO-*d*<sub>6</sub> at 30 °C.  
Table 4. All <sup>1</sup>H chemical shifts (δ in ppm) of **4**.
- Page 8: Figure 6. <sup>1</sup>H NMR spectrum of **5** in DMSO-*d*<sub>6</sub> at 30 °C.  
Table 5. All <sup>1</sup>H chemical shifts (δ in ppm) of **5**.
- Page 9: Figure 7. Temperature dependences of amide protons in **1-5** and **GS**.
- Page 10: Figure 8. J<sub>NH-<sup>α</sup>CH</sub> values of amide protons in **1-5** and **GS**.
- Page 11: Figure 9. Chemical shift perturbation of α protons in **1-5** and **GS**.
- Page 12: Figure 10. ROESY spectra of **1**.  
Figure 11. Proposed secondary structure and spatial ROE crosspeaks of **1**.
- Page 13: Figure 12. ROESY spectra of **2**.  
Figure 13. Proposed secondary structure and spatial ROE crosspeaks of **2**.
- Page 14: Figure 14. ROESY spectra of **3**.  
Figure 15. Proposed secondary structure and spatial ROE crosspeaks of **3**.

Page 15: Figure 16. ROESY spectra of **4**.

Figure 17. Proposed secondary structure and spartial ROE cosspeaks of **4**.

Page 16: Figure 18. ROESY spectra of **5**.

Figure 19. Proposed secondary structure and spartial ROE cosspeaks of **5**.

Page 17: Table 6. Hemolytic activities of GS and **1-5** (% hemolysis).

### HPLC analyses of 1-5

HPLC analyses of **1-5** were achieved using analytical reverse phase HPLC system (800 Series, JASCO LTD., Tokyo, Japan), equipped with an 880 intelligent HPLC pump, an 875-UV intelligent UV/Vis detector, an 860-CD column oven, and a TSK-Gel C18 column (4.6 x 150 mm, 10 mm particle size, Tosoh Co., Tokyo, Japan). Chromatographies were carried out by a flow rate of 1 ml/min at 30 °C and monitored at 220 nm. Elution solvents used methanol-0.1% TFAaq (70:30) for **1**, methanol-0.1 % TFAaq (65:35) for **2** and methanol-0.1 % TFAaq (55:45) for **3-5**. HPLC profiles of **1-5** were shown in next figures.

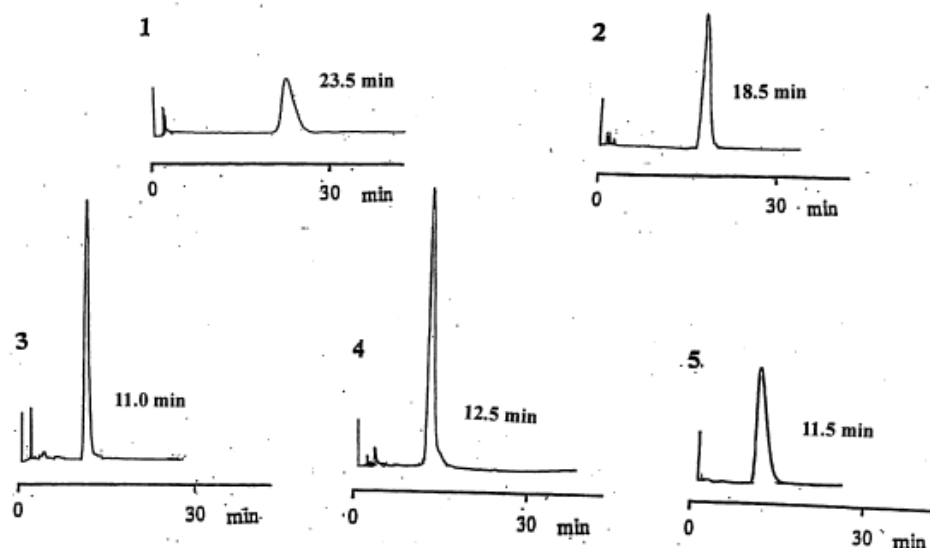

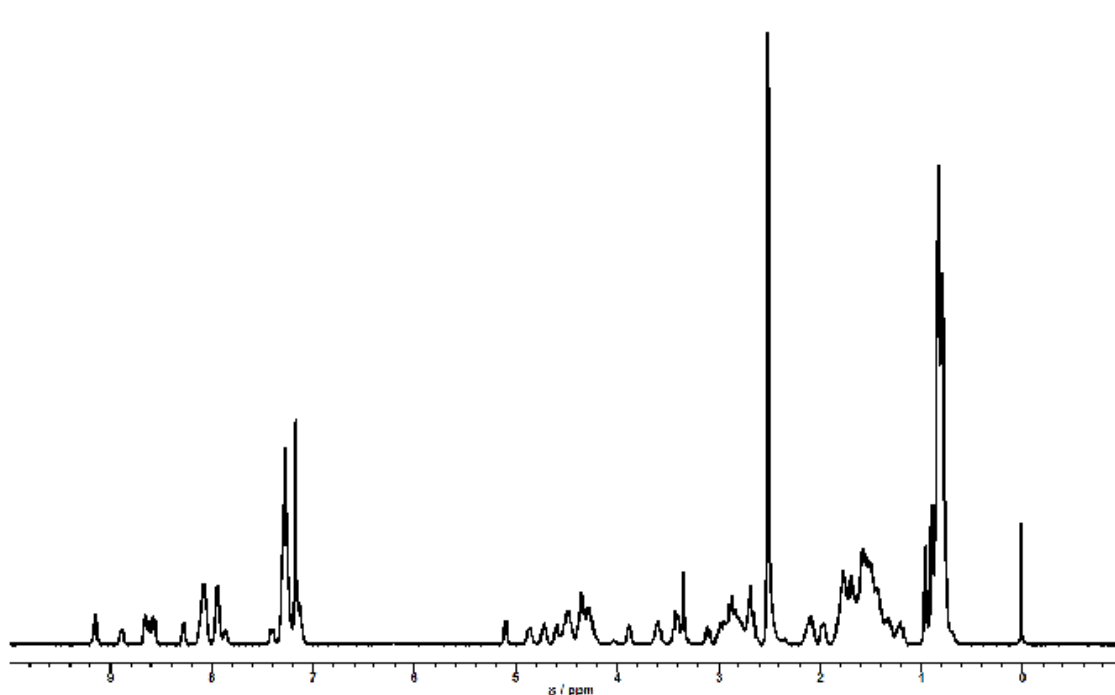

Figure 2.  $^1\text{H}$  NMR spectrum of **1** in  $\text{DMSO-}d_6$  at 30 °C.

Table 1. All  $^1\text{H}$  chemical shifts ( $\delta$  in ppm) of **1**.

|                |                     | $^{\alpha}\text{NH}$ | $^{\alpha}\text{H}$ | $^{\beta}\text{H}$ | $^{\gamma}\text{H}$ | $^{\delta}\text{H}$ | $^{\delta}\text{NH}$ | others         |
|----------------|---------------------|----------------------|---------------------|--------------------|---------------------|---------------------|----------------------|----------------|
| $\delta$ (ppm) | Val <sup>1</sup>    | 7.28                 | 4.48                | 2.09               | 0.82                |                     |                      |                |
|                | Orn <sup>2</sup>    | 8.59                 | 4.88                | 1.57               | 1.59                | 2.68                | 8.09                 |                |
|                | Leu <sup>3</sup>    | 8.56                 | 4.53                | 1.55               | 1.57                | 0.81                |                      |                |
|                | Leu <sup>4</sup>    | 8.03                 | 3.88                | 1.51<br>1.35       | 1.77                | 0.89                |                      |                |
|                | D-Phe <sup>5</sup>  | 8.67                 | 4.28                | 3.12<br>2.67       |                     |                     |                      | Ar<br>7.34-7.1 |
|                | Pro <sup>6</sup>    |                      | 5.11                | 2.12               | 1.73                | 3.50<br>3.34        |                      |                |
|                | Val <sup>7</sup>    | 7.40                 | 4.32                | 1.77               | 0.82                |                     |                      |                |
|                | Orn <sup>8</sup>    | 8.87                 | 4.72                | 1.66<br>1.82       | 1.55<br>1.73        | 2.76<br>2.93        | 7.95                 |                |
|                | Leu <sup>9</sup>    | 8.28                 | 4.59                | 1.21<br>1.44       | 1.48                | 0.82                |                      |                |
|                | D-Phe <sup>10</sup> | 9.11                 | 4.38                | 3.00<br>2.87       |                     |                     |                      | Ar<br>7.34-7.1 |
|                | Pro <sup>11</sup>   |                      | 4.34                | 1.99<br>1.51       | 1.62                | 3.58<br>2.52        |                      |                |

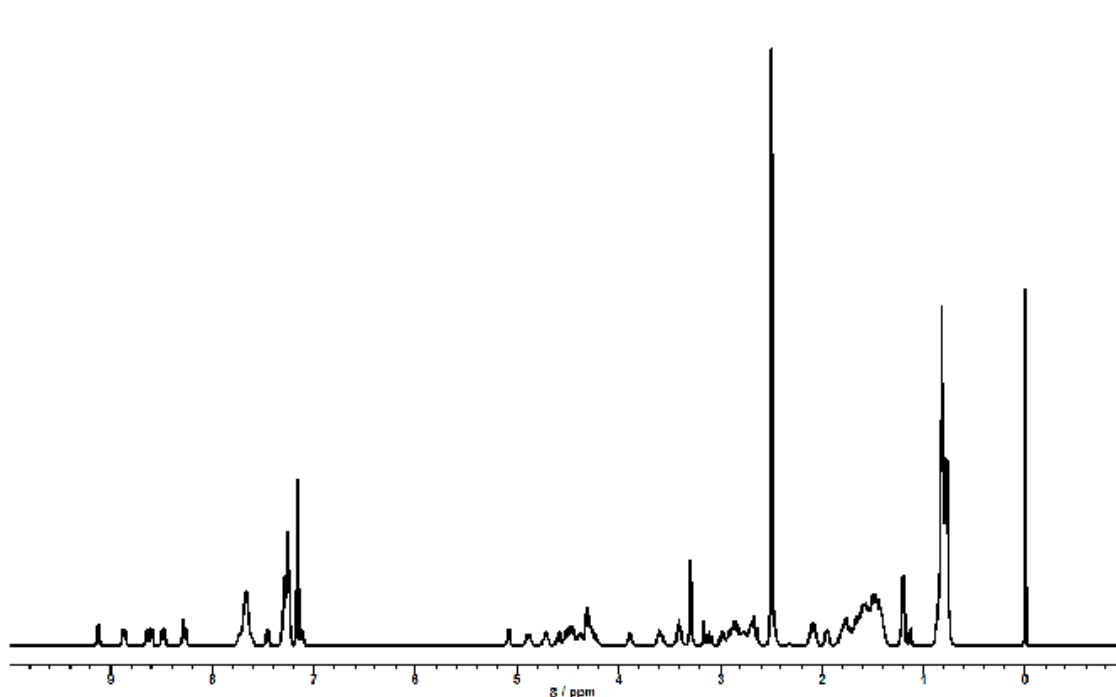

Figure 3.  $^1\text{H}$  NMR spectrum of **2** in  $\text{DMSO-}d_6$  at 30 °C.

Table 2. All  $^1\text{H}$  chemical shifts ( $\delta$  in ppm) of **2**.

|                |                     | $^{\alpha}\text{NH}$ | $^{\alpha}\text{H}$ | $^{\beta}\text{H}$ | $^{\gamma}\text{H}$ | $^{\delta}\text{H}$ | $^{\delta}\text{NH}$ | others         |
|----------------|---------------------|----------------------|---------------------|--------------------|---------------------|---------------------|----------------------|----------------|
| $\delta$ (ppm) | Val <sup>1</sup>    | 7.24                 | 4.47                | 2.10               | 0.81                |                     |                      |                |
|                | Orn <sup>2</sup>    | 8.66                 | 4.88                | 1.60<br>1.48       | 1.45                | 2.71                | 7.67                 |                |
|                | Leu <sup>3</sup>    | 8.49                 | 4.53                | 1.55<br>1.48       | 1.55                | 0.78                |                      |                |
|                | Ala <sup>4</sup>    | 8.31                 | 3.88                | 1.22               |                     |                     |                      |                |
|                | D-Phe <sup>5</sup>  | 8.60                 | 4.27                | 3.12<br>2.68       |                     |                     |                      | Ar<br>7.1-7.32 |
|                | Pro <sup>6</sup>    |                      | 5.09                | 2.10               | 1.77                | 3.42                |                      |                |
|                | Val <sup>7</sup>    | 7.45                 | 4.29                | 1.77               | 0.81                |                     |                      |                |
|                | Orn <sup>8</sup>    | 8.87                 | 4.70                | 1.88<br>1.77       | 1.60                | 2.71                | 7.67                 |                |
|                | Leu <sup>9</sup>    | 8.27                 | 4.59                | 1.45<br>1.22       | 1.39                | 0.84                |                      |                |
|                | D-Phe <sup>10</sup> | 9.13                 | 4.38                | 2.98<br>2.86       |                     |                     |                      | Ar<br>7.1-7.32 |
|                | Pro <sup>11</sup>   |                      | 4.30                | 1.97<br>1.48       | 1.60                | 3.62<br>2.46        |                      |                |

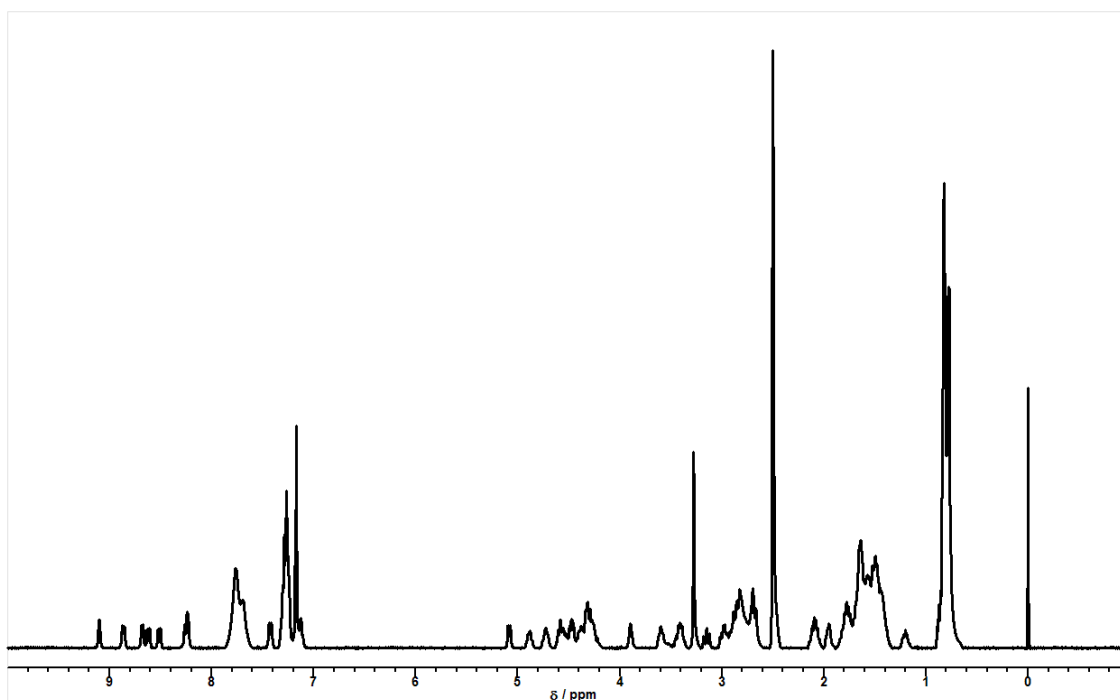

Figure 4.  $^1\text{H}$  NMR spectrum of **3** in  $\text{DMSO-}d_6$  at 30 °C.

Table 3. All  $^1\text{H}$  chemical shifts ( $\delta$  in ppm) of **3**.

|                |                     | $^{\alpha}\text{NH}$ | $^{\alpha}\text{H}$ | $^{\beta}\text{H}$ | $^{\gamma}\text{H}$ | $^{\delta}\text{H}$ | $^{\delta}\text{NH}$ | others          |
|----------------|---------------------|----------------------|---------------------|--------------------|---------------------|---------------------|----------------------|-----------------|
| $\delta$ (ppm) | Val <sup>1</sup>    | 7.25                 | 4.47                | 2.08               | 0.81                |                     |                      |                 |
|                | Orn <sup>2</sup>    | 8.62                 | 4.88                | 1.61<br>1.54       | 1.48                | 2.71                | 7.74                 |                 |
|                | Leu <sup>3</sup>    | 8.53                 | 4.54                | 1.51               | 1.55                | 0.81                |                      |                 |
|                | Orn <sup>4</sup>    | 8.22                 | 3.88                | 1.64               | 1.57                | 2.84                | 7.66                 |                 |
|                | D-Phe <sup>5</sup>  | 8.68                 | 4.28                | 3.15<br>2.68       |                     |                     |                      | Ar<br>7.09-7.32 |
|                | Pro <sup>6</sup>    |                      | 5.10                | 2.11               | 1.86<br>1.71        | 3.41                |                      |                 |
|                | Val <sup>7</sup>    | 7.43                 | 4.31                | 1.77               | 0.81                |                     |                      |                 |
|                | Orn <sup>8</sup>    | 8.87                 | 4.72                | 1.80<br>1.73       | 1.61                | 2.78                | 7.78                 |                 |
|                | Leu <sup>9</sup>    | 8.25                 | 4.56                | 1.44               | 1.50                | 0.81                |                      |                 |
|                | D-Phe <sup>10</sup> | 9.10                 | 4.38                | 3.00<br>2.89       |                     |                     |                      | Ar<br>7.09-7.32 |
|                | Pro <sup>11</sup>   |                      | 4.32                | 1.93<br>1.50       | 1.50                | 3.59<br>2.49        |                      |                 |

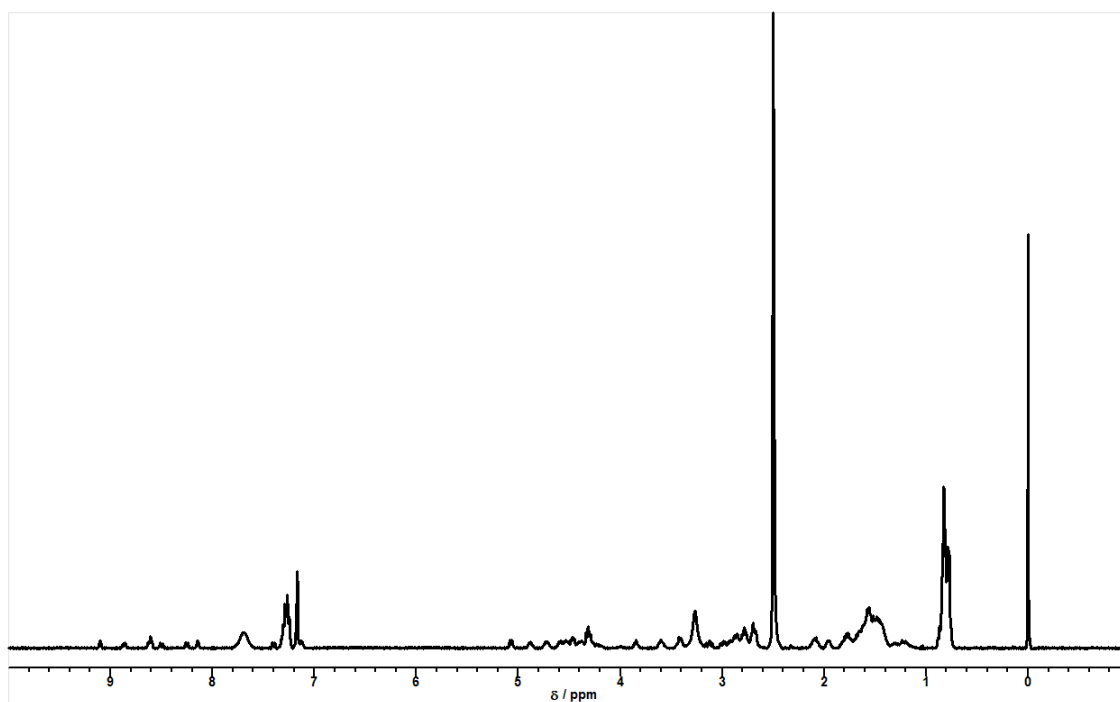

Figure 5.  $^1\text{H}$  NMR spectrum of **4** in  $\text{DMSO-}d_6$  at 30 °C.

Table 4. All  $^1\text{H}$  chemical shifts ( $\delta$  in ppm) of **4**.

|                |                     | $^{\alpha}\text{NH}$ | $^{\alpha}\text{H}$ | $^{\beta}\text{H}$ | $^{\gamma}\text{H}$ | $^{\delta}\text{H}$ | $^{\epsilon}\text{NH}$ | others                                                    |
|----------------|---------------------|----------------------|---------------------|--------------------|---------------------|---------------------|------------------------|-----------------------------------------------------------|
| $\delta$ (ppm) | Val <sup>1</sup>    | 7.24                 | 4.47                | 2.09               | 0.80                |                     |                        |                                                           |
|                | Orn <sup>2</sup>    | 8.62                 | 4.88                | 1.59               | 1.45                | 2.70                | 7.68                   |                                                           |
|                | Leu <sup>3</sup>    | 8.51                 | 4.53                | 1.55               | 1.52                | 0.80                |                        |                                                           |
|                | Lys <sup>4</sup>    | 8.13                 | 3.85                | 1.56               | 1.41                | 1.30                |                        | $^{\epsilon}\text{H}$ 2.78<br>$^{\epsilon}\text{NH}$ 7.68 |
|                | D-Phe <sup>5</sup>  | 8.60                 | 4.29                | 3.14               |                     |                     |                        | Ar<br>7.34 - 7.10                                         |
|                | Pro <sup>6</sup>    |                      | 5.06                | 2.09               | 1.69                | 3.41                |                        |                                                           |
|                | Val <sup>7</sup>    | 7.39                 | 4.32                | 1.77               | 0.80                |                     |                        |                                                           |
|                | Orn <sup>8</sup>    | 8.86                 | 4.73                | 1.82               | 1.59                | 2.79                | 7.69                   |                                                           |
|                | Leu <sup>9</sup>    | 8.24                 | 4.59                | 1.41               | 1.48                | 0.80                |                        |                                                           |
|                | D-Phe <sup>10</sup> | 9.09                 | 4.38                | 2.97               |                     |                     |                        | Ar<br>7.34 - 7.10                                         |
|                | Pro <sup>11</sup>   |                      | 4.30                | 1.96               | 1.50                | 3.60                |                        |                                                           |
|                |                     |                      | 1.50                |                    | 2.50                |                     |                        |                                                           |

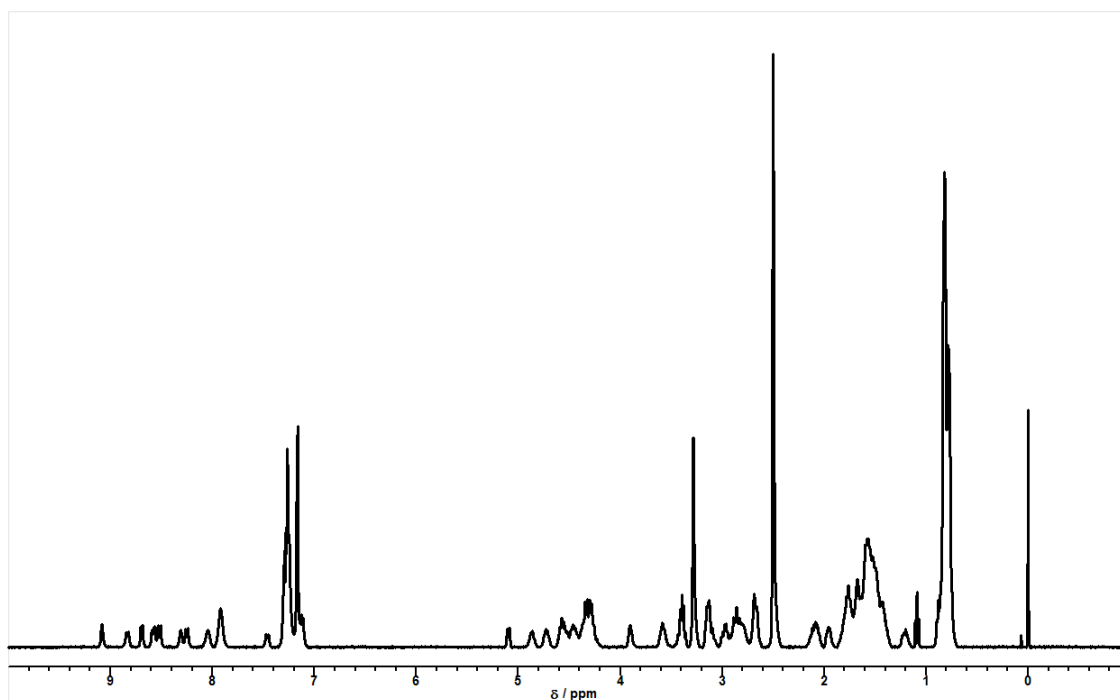

Figure 6.  $^1\text{H}$  NMR spectrum of **5** in  $\text{DMSO-}d_6$  at  $30\text{ }^\circ\text{C}$ .

Table 5. All  $^1\text{H}$  chemical shifts ( $\delta$  in ppm) of **5**.

|                |                     | $^{\alpha}\text{NH}$ | $^{\alpha}\text{H}$ | $^{\beta}\text{H}$ | $^{\gamma}\text{H}$ | $^{\delta}\text{H}$ | $^{\epsilon}\text{NH}$ | others         |
|----------------|---------------------|----------------------|---------------------|--------------------|---------------------|---------------------|------------------------|----------------|
| $\delta$ (ppm) | Val <sup>1</sup>    | 7.27                 | 4.47                | 2.10               | 0.81                |                     |                        |                |
|                | Orn <sup>2</sup>    | 8.59                 | 4.88                | 1.57               | 1.48                | 2.71                | 8.04                   |                |
|                | Leu <sup>3</sup>    | 8.51                 | 4.56                | 1.51               | 1.57                | 0.81                |                        |                |
|                | Arg <sup>4</sup>    | 8.29                 | 3.90                | 1.63               | 1.68<br>1.66        | 2.88<br>2.82        | 7.95                   | NH<br>7.9-7.95 |
|                | D-Phe <sup>5</sup>  | 8.69                 | 4.29                | 3.12<br>2.68       |                     |                     |                        | Ar<br>7.1-7.32 |
|                | Pro <sup>6</sup>    |                      | 5.11                | 2.13               | 1.77                | 3.41                |                        |                |
|                | Val <sup>7</sup>    | 7.46                 | 4.29                | 1.77               | 0.84                |                     |                        |                |
|                | Orn <sup>8</sup>    | 8.84                 | 4.73                | 1.80               | 1.63                | 3.15                | 7.90                   |                |
|                | Leu <sup>9</sup>    | 8.25                 | 4.59                | 1.51               | 1.57                | 0.81                |                        |                |
|                | D-Phe <sup>10</sup> | 9.08                 | 4.34                | 3.02<br>2.97       |                     |                     |                        | Ar<br>7.1-7.32 |
|                | Pro <sup>11</sup>   |                      | 4.32                | 1.98<br>1.48       | 1.49                | 3.59<br>2.51        |                        |                |



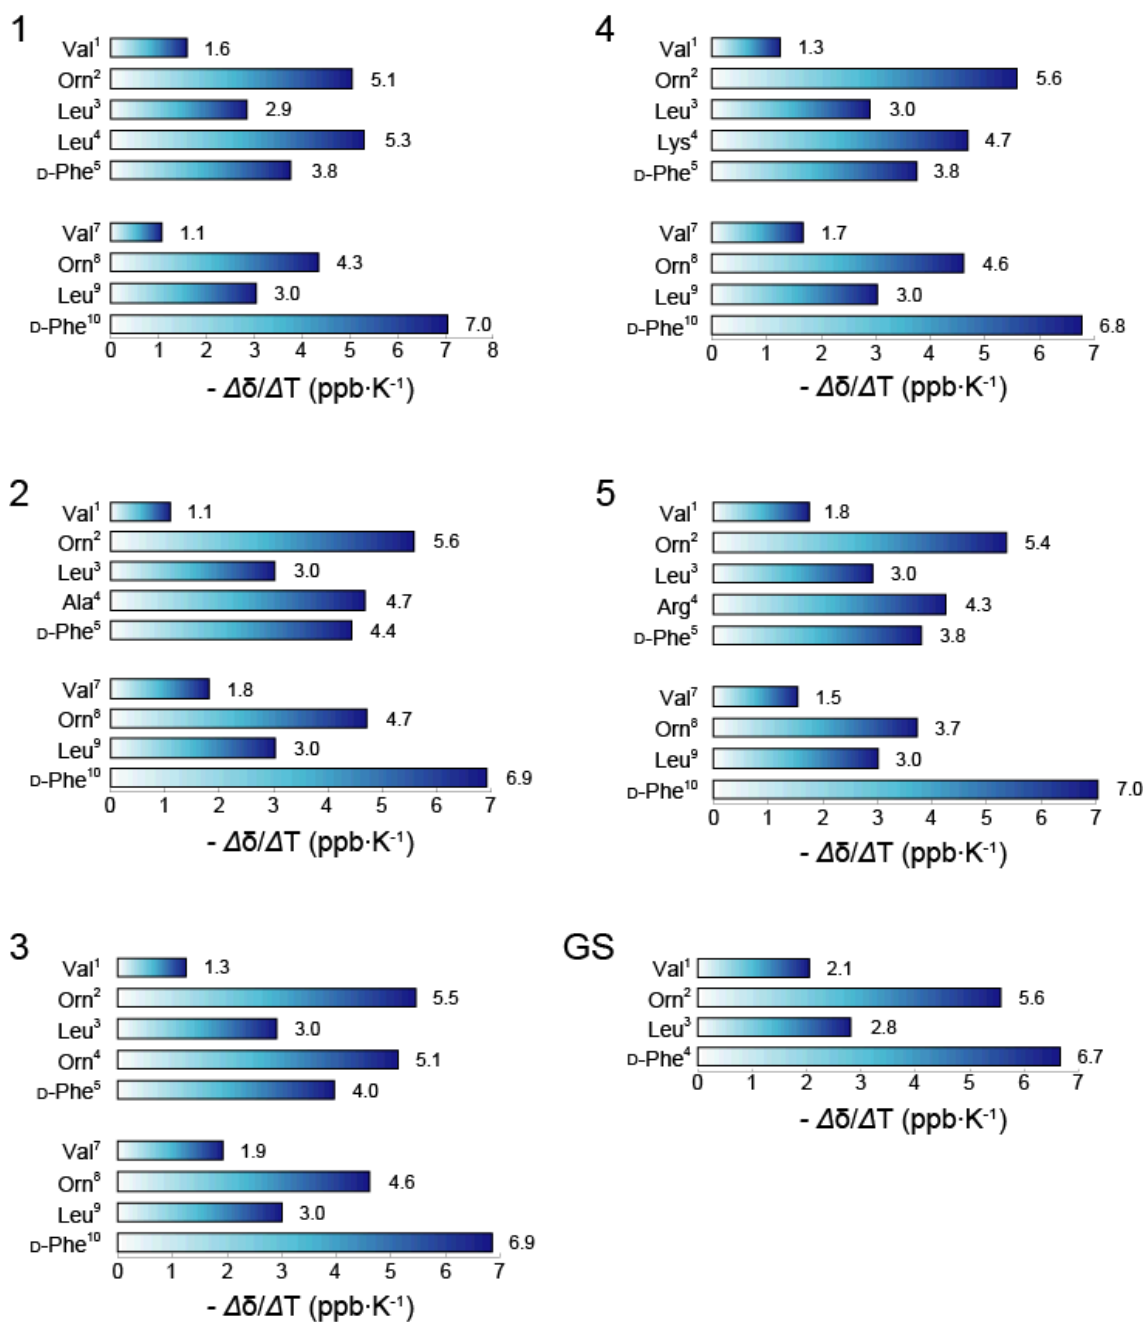

Figure 7. Temperature dependences of amide protons in 1-5 and GS.

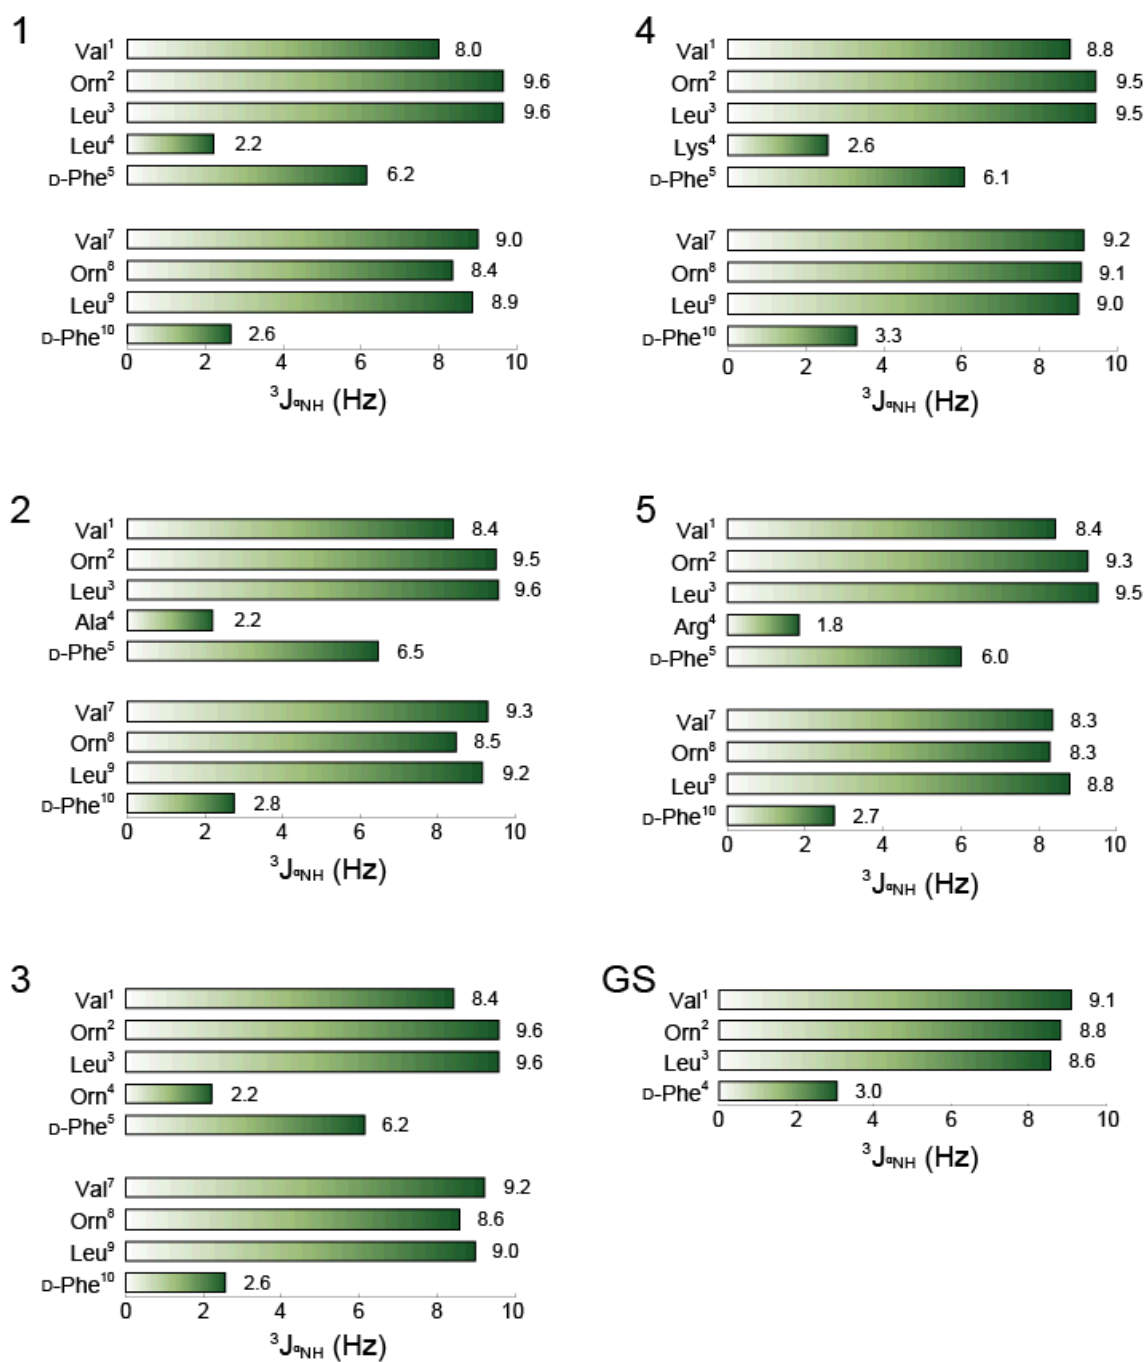

Figure 8.  $J_{\text{NH}-\alpha\text{CH}}$  values of amide protons in 1-5 and GS.

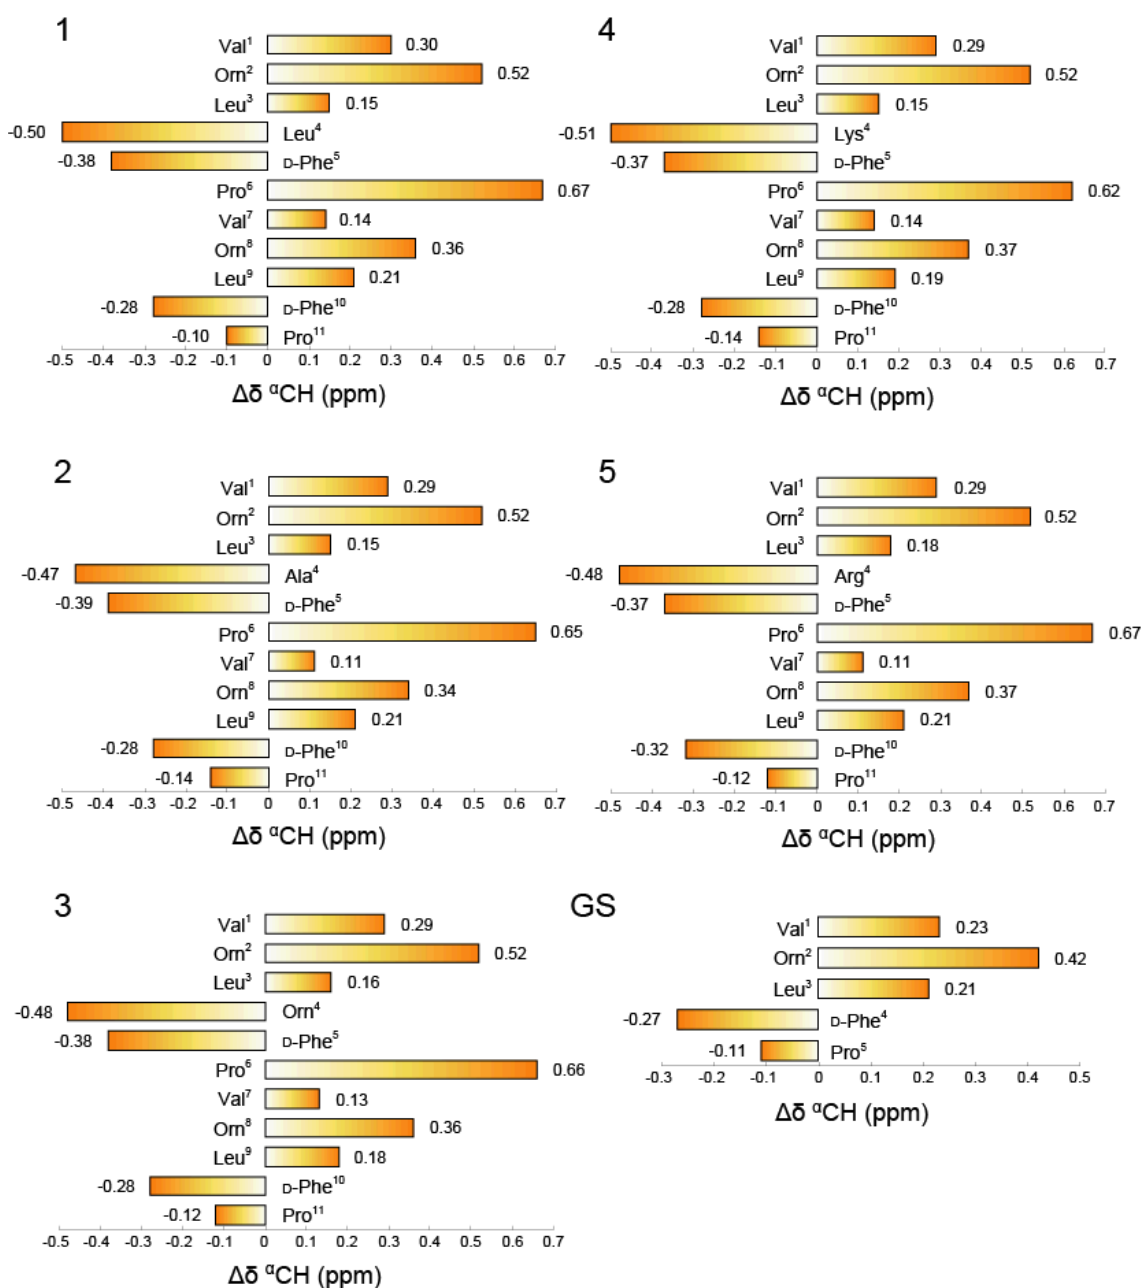

Figure 9. Chemical shift perturbations of  $\alpha$  protons in 1-5 and GS.

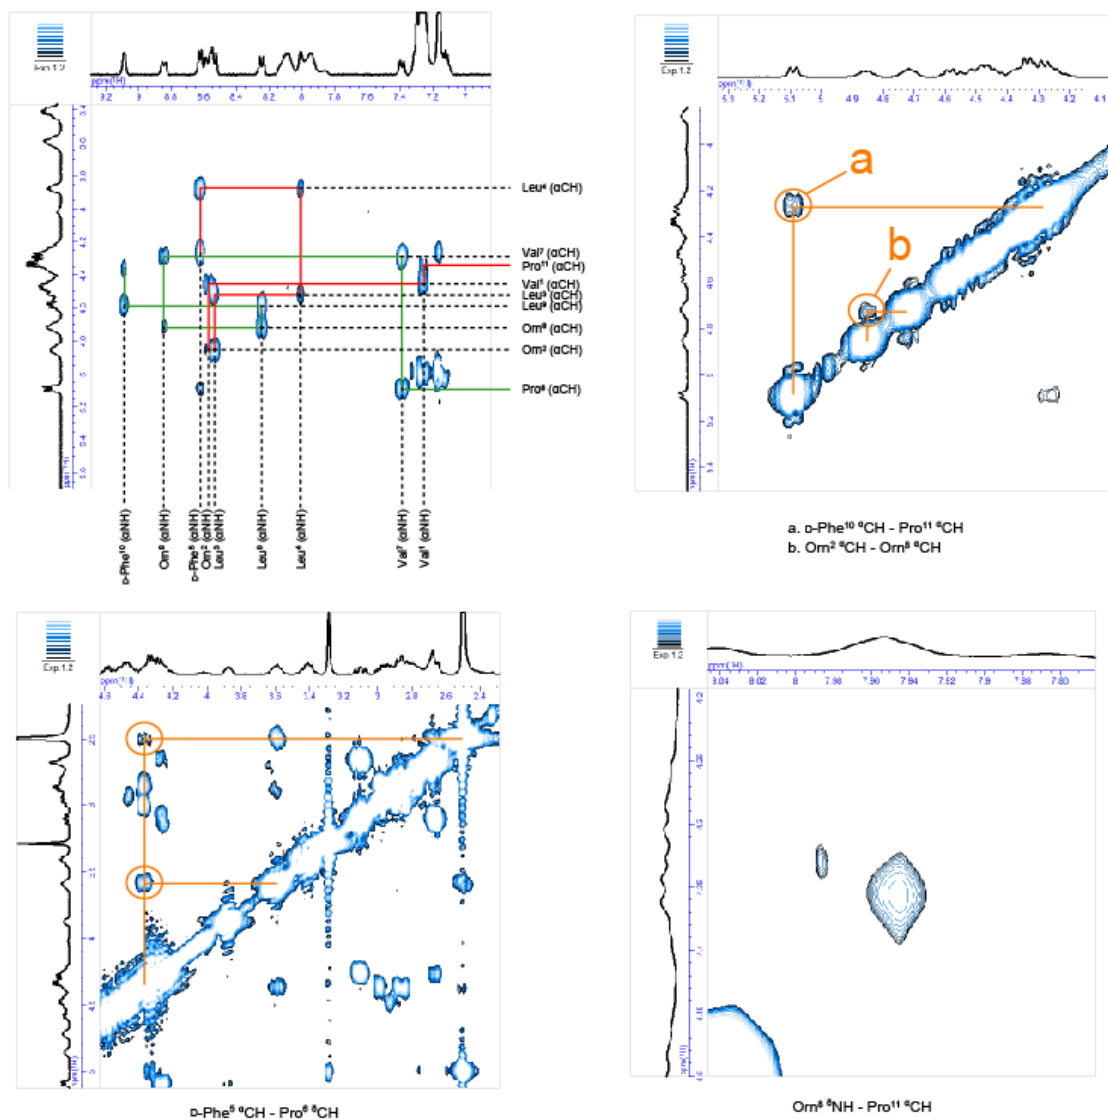

Figure 10. ROESY spectra of **1**.

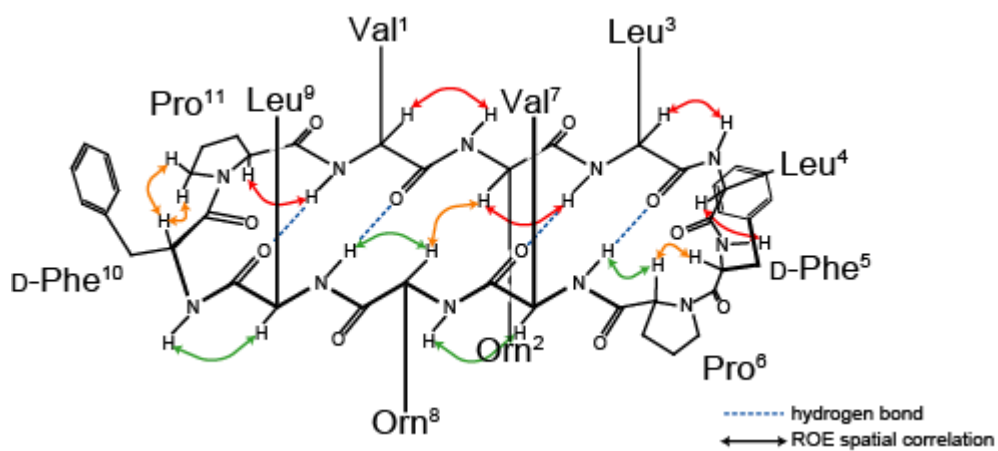

Figure 11. Proposed secondary structure and spatial ROE crosspeaks of **1**.

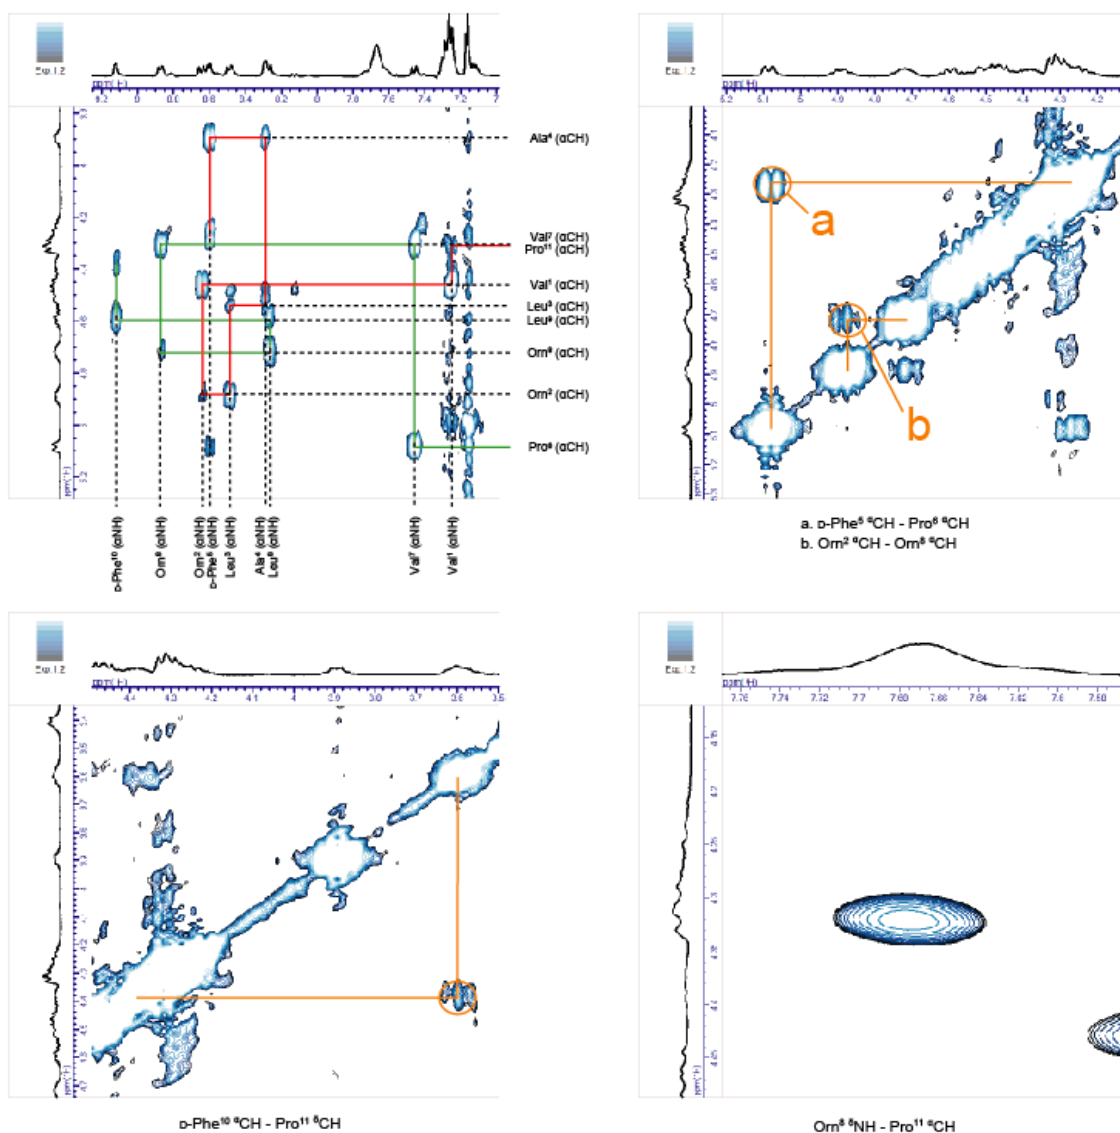

Figure 12. ROESY spectra of **2**.

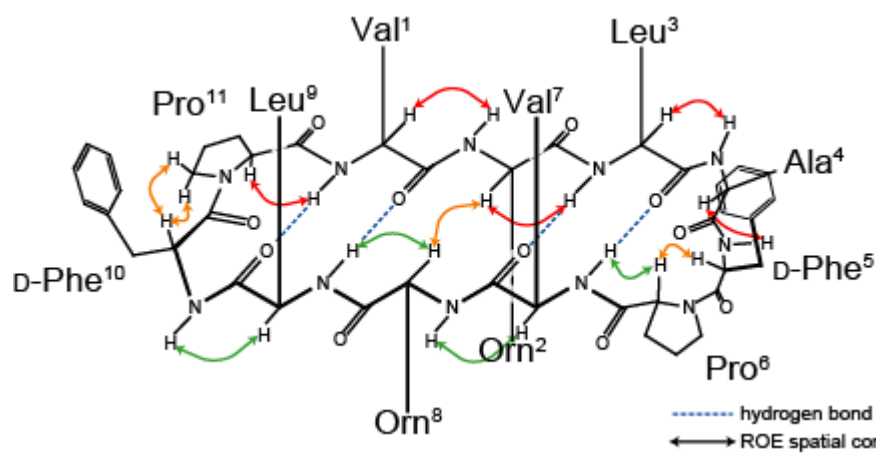

Figure 13. Proposed secondary structure and spatial ROE crosspeaks of **2**.

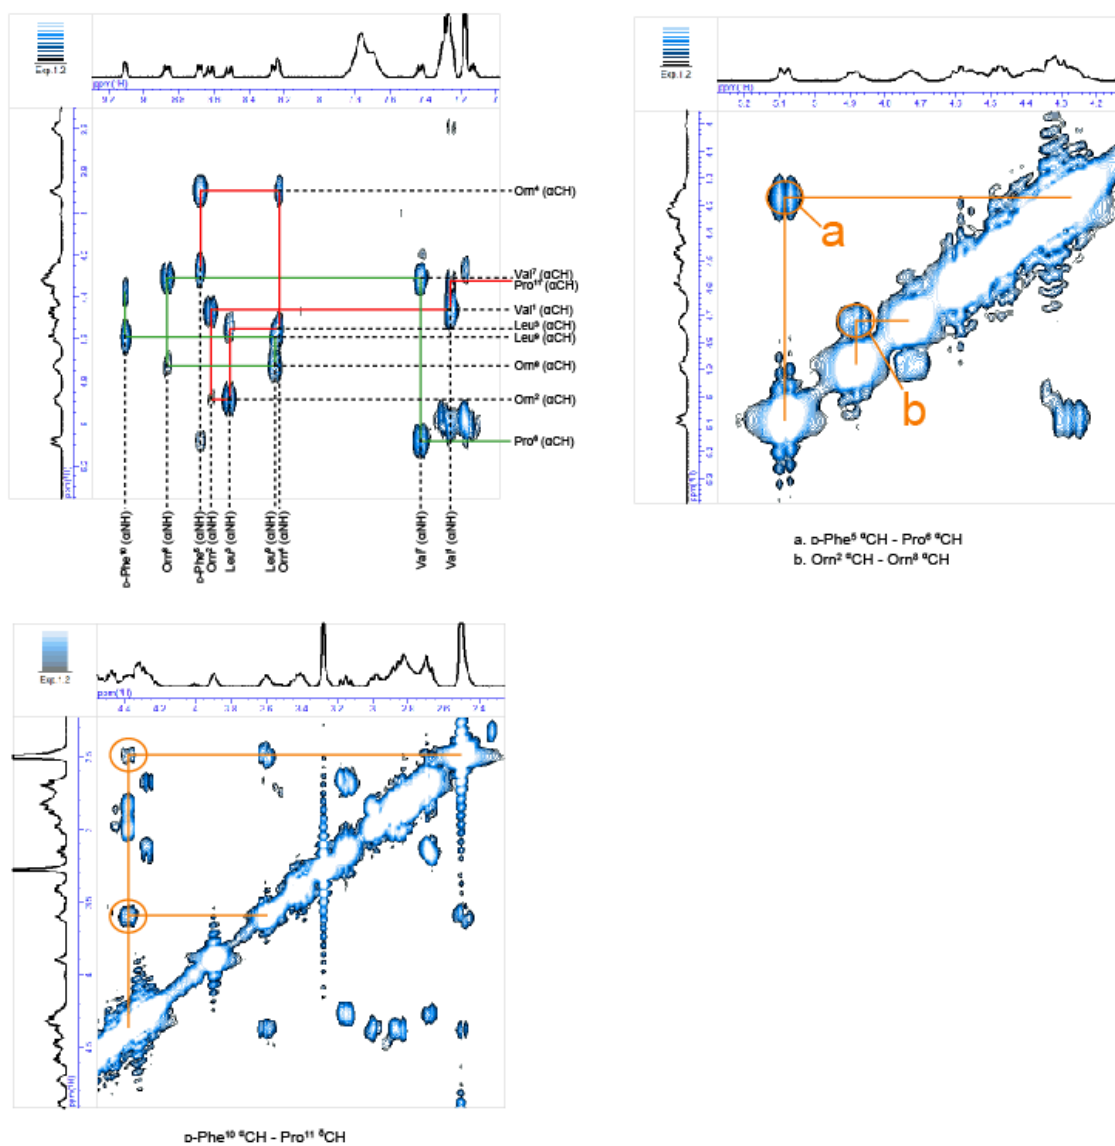

Figure 14. ROESY spectra of **3**

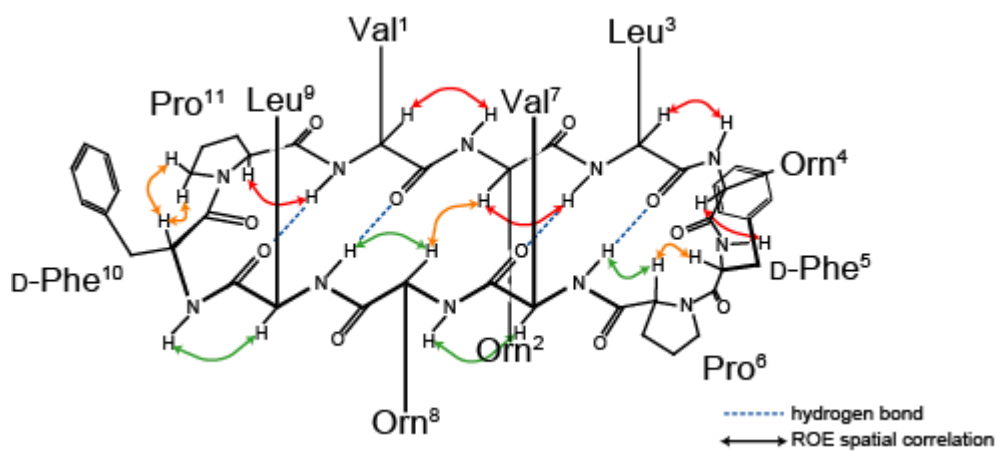

Figure 15. Proposed secondary structure and spatial ROE crosspeaks of **3**.

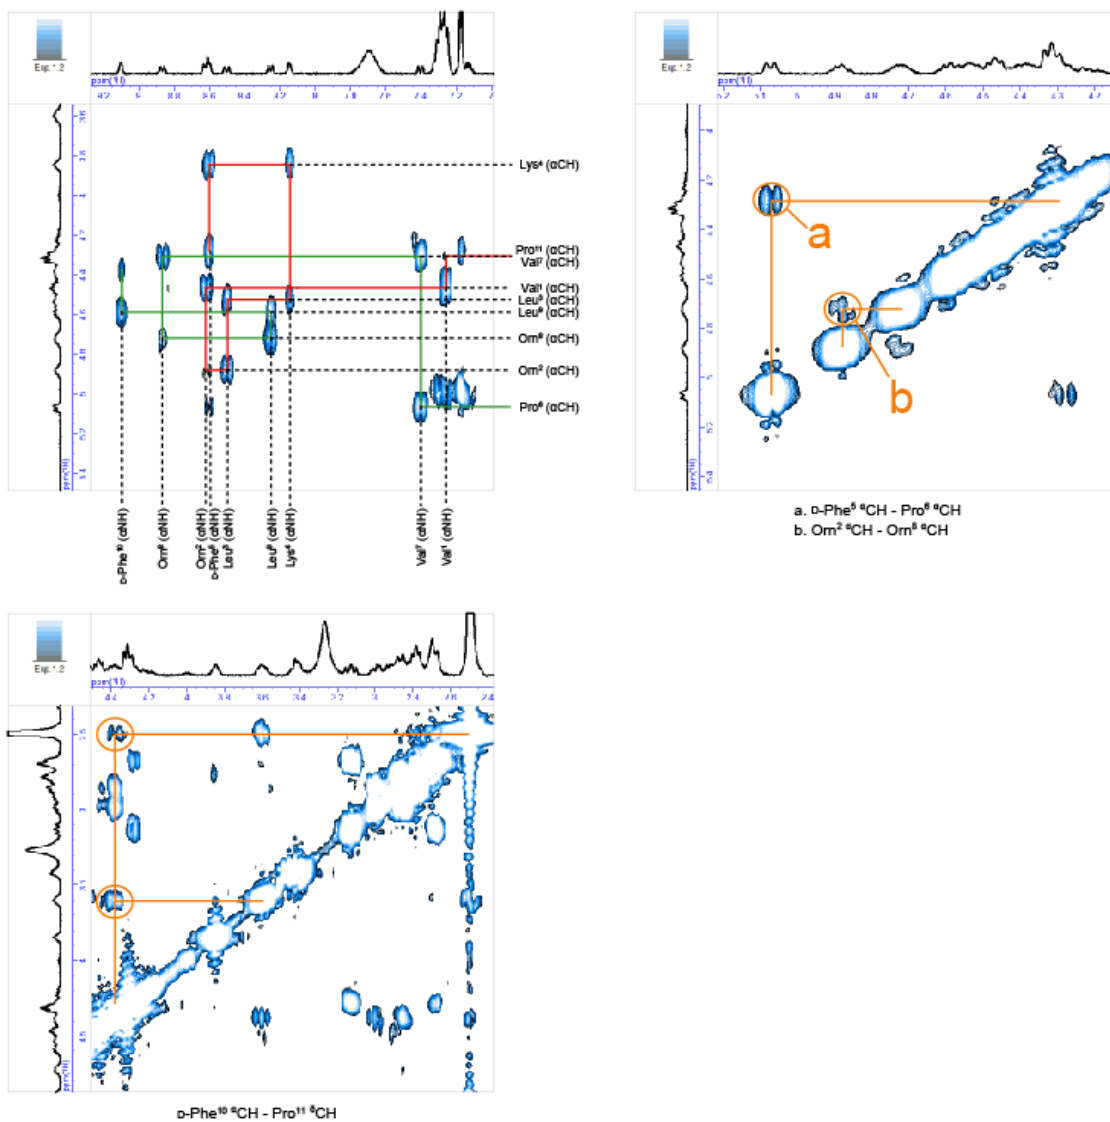

Figure 16. ROESY spectra of 4

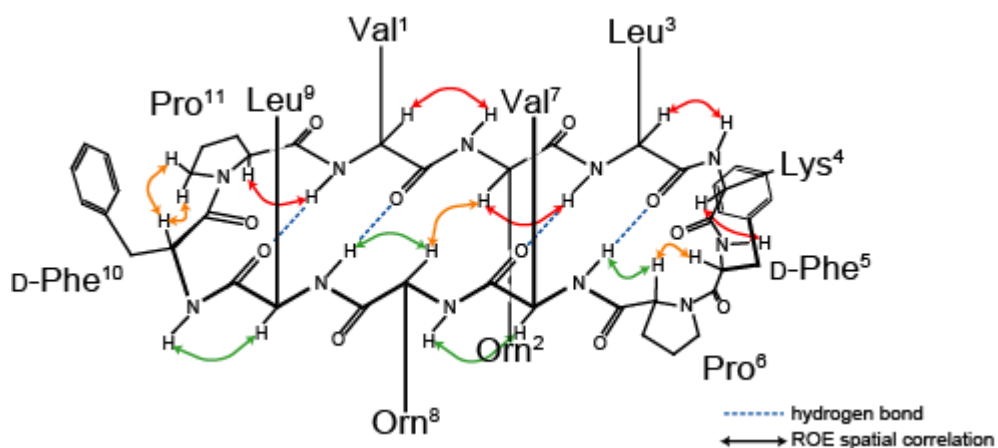

Figure 17. Proposed secondary structure and spatial ROE crosspeaks of 4.

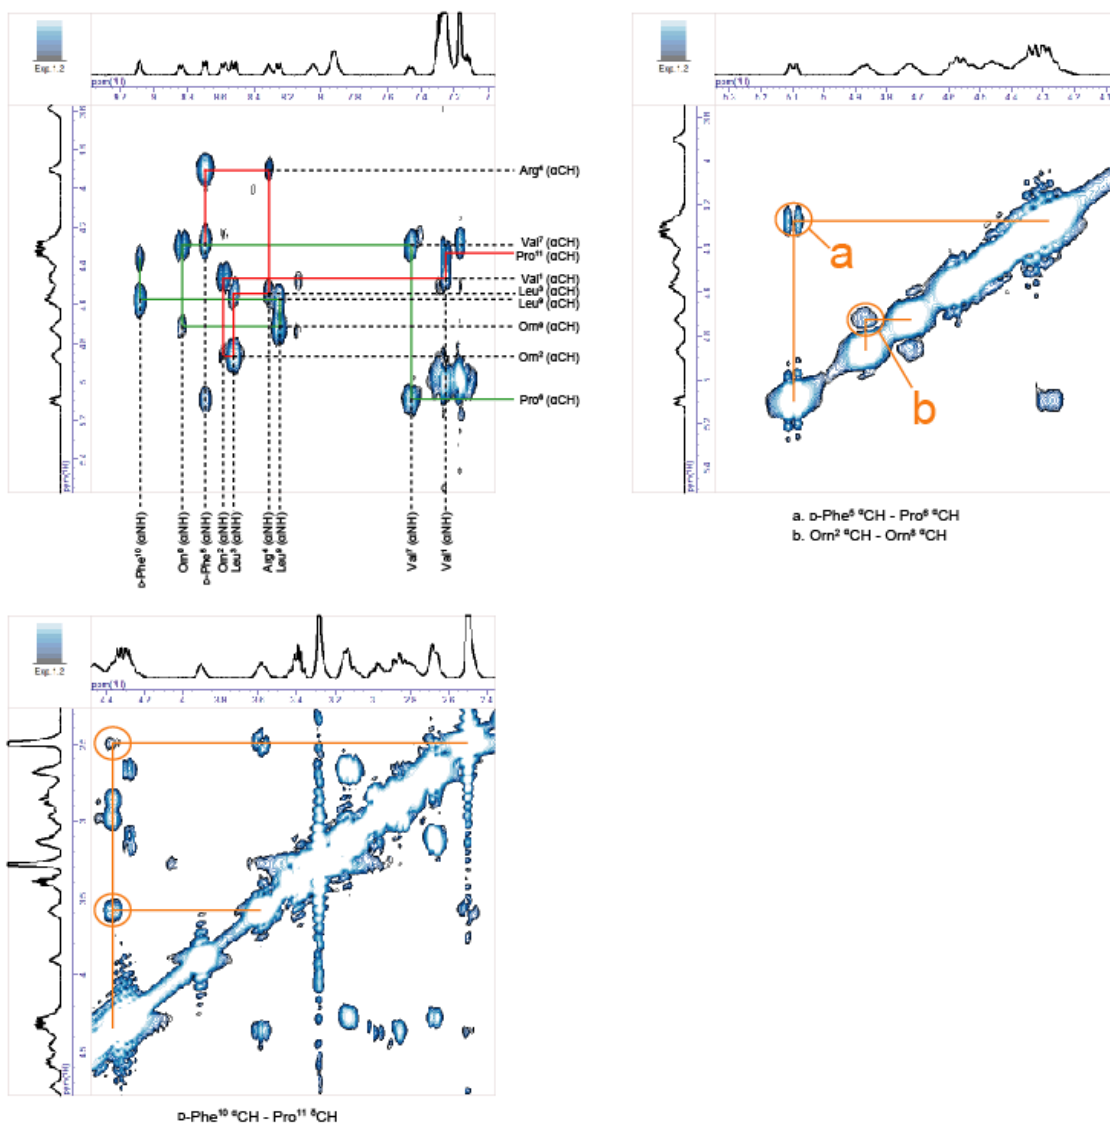

Figure 18. ROESY spectra of **5**

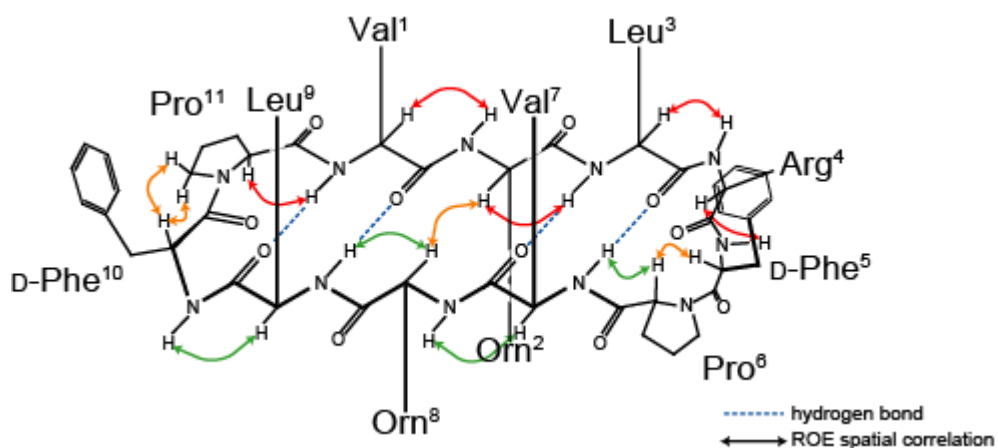

Figure 19. Proposed secondary structure and spatial ROE crosspeaks of **5**.



Table 6. Hemolytic activities of GS and 1-5 (% hemolysis).

| Peptide   | Peptide concentration ( $\mu\text{M}$ ) |                  |                  |                  |                  |                   |
|-----------|-----------------------------------------|------------------|------------------|------------------|------------------|-------------------|
|           | 1                                       | 10               | 20               | 30               | 40               | 50                |
| <b>GS</b> | 0.49 $\pm$ 0.57                         | 10.27 $\pm$ 0.59 | 27.04 $\pm$ 1.16 | 58.64 $\pm$ 0.89 | 84.06 $\pm$ 0.67 | 94.80 $\pm$ 0.75  |
| 1         | 2.27 $\pm$ 0.12                         | 15.20 $\pm$ 0.61 | 44.42 $\pm$ 0.63 | 80.02 $\pm$ 0.40 | 99.88 $\pm$ 0.31 | 100.00 $\pm$ 1.22 |
| 2         | 1.95 $\pm$ 0.32                         | 6.68 $\pm$ 0.09  | 8.97 $\pm$ 0.44  | 12.30 $\pm$ 0.79 | 17.97 $\pm$ 0.53 | 23.29 $\pm$ 0.52  |
| 3         | 1.78 $\pm$ 0.68                         | 4.49 $\pm$ 0.62  | 6.04 $\pm$ 0.30  | 6.95 $\pm$ 0.46  | 7.85 $\pm$ 0.76  | 8.32 $\pm$ 0.03   |
| 4         | 2.15 $\pm$ 0.19                         | 4.26 $\pm$ 0.65  | 5.73 $\pm$ 0.78  | 6.44 $\pm$ 0.55  | 7.60 $\pm$ 0.93  | 8.20 $\pm$ 0.21   |
| 5         | 1.88 $\pm$ 0.40                         | 5.20 $\pm$ 0.49  | 8.47 $\pm$ 0.45  | 11.12 $\pm$ 0.76 | 12.91 $\pm$ 0.55 | 13.86 $\pm$ 0.82  |

| Peptide   | Peptide concentration ( $\mu\text{M}$ ) |                   |                   |
|-----------|-----------------------------------------|-------------------|-------------------|
|           | 60                                      | 80                | 100               |
| <b>GS</b> | 100.00 $\pm$ 0.53                       | 100.00 $\pm$ 0.56 | 100.00 $\pm$ 0.75 |
| 1         | 100.00 $\pm$ 1.17                       | 100.00 $\pm$ 0.67 | 100.00 $\pm$ 0.57 |
| 2         | 26.69 $\pm$ 0.36                        | 38.36 $\pm$ 0.51  | 53.69 $\pm$ 0.41  |
| 3         | 9.19 $\pm$ 0.41                         | 9.97 $\pm$ 0.38   | 11.65 $\pm$ 0.78  |
| 4         | 9.46 $\pm$ 0.13                         | 10.67 $\pm$ 0.15  | 11.85 $\pm$ 0.74  |
| 5         | 15.32 $\pm$ 0.49                        | 17.68 $\pm$ 0.55  | 19.98 $\pm$ 0.79  |

The experiments were carried out three times for each peptide.
